# Supplementary material
Source: publisher figshare collection journal article supplement (https://asha.figshare.com/articles/dataset/_/19624020)
Supplement: Supplementary file 1 [file 1]

# **Supplemental Material S2. GFTA – sounds in words list – total consonants scored.**

| sound | frequency | Position in Words |        |       |
|-------|-----------|-------------------|--------|-------|
|       |           | Initial           | Medial | Final |
| h     | 1         | 1                 |        |       |
| s     | 9         | 2                 | 2      | 5     |
| t     | 5         | 1                 | 2      | 2     |
| l     | 7         | 1                 | 3      | 3     |
| f     | 5         | 3                 | 1      | 1     |
| n     | 10        | 1                 | 4      | 5     |
| k     | 5         | 3                 | 1      | 1     |
| p     | 7         | 2                 | 3      | 2     |
| g     | 3         | 1                 | 1      | 1     |
| w     | 3         | 3                 |        |       |
| d     | 3         | 1                 | 1      | 1     |
| ch    | 4         | 2                 | 1      | 1     |
| z     | 5         | 1                 | 1      | 3     |
| er    | 6         |                   | 3      | 3     |
| y     | 1         | 1                 |        |       |
| v     | 3         | 1                 | 1      | 1     |
| kj    | 1         |                   | 1      |       |
| m     | 8         | 1                 | 4      | 3     |
| sh    | 3         | 1                 | 1      | 1     |
| r     | 5         | 2                 | 2      | 1     |
| b     | 5         | 3                 | 1      | 1     |
| ng    | 5         |                   | 1      | 4     |
| th-v  | 2         | 1                 | 1      |       |
| dg    | 3         | 1                 | 1      | 1     |
| th    | 3         | 1                 | 1      | 1     |
| pl    | 1         | 1                 |        |       |
| bl    | 1         | 1                 |        |       |
| br    | 1         | 1                 |        |       |
| sl    | 1         | 1                 |        |       |
| dr    | 1         | 1                 |        |       |
| skw   | 1         | 1                 |        |       |
| kl    | 1         | 1                 |        |       |
| fl    | 1         | 1                 |        |       |
| st    | 1         | 1                 |        |       |
| kr    | 1         | 1                 |        |       |
| tr    | 1         | 1                 |        |       |
| Total | 123       |                   |        |       |
