# Supplementary material
Source: publisher figshare collection journal article supplement (https://asha.figshare.com/articles/dataset/_/19624020)
Supplement: Supplementary file 2 [file 1]

**Supplemental Material S3.** Per child sound errors & VMPAC scores.

| Total Sounds Possible = 123 |        |         |              | Errors/Total Sounds* (%) |         | Errors/Total Errors (%) |         | VMPAC Score (%) |
|-----------------------------|--------|---------|--------------|--------------------------|---------|-------------------------|---------|-----------------|
| CHILD                       | ArtErr | PhonErr | Total Errors | ArtErr                   | PhonErr | ArtErr                  | PhonErr | Sequencing      |
| 1                           | 3      | 4       | 7            | 2.44                     | 3.25    | 42.86                   | 57.14   | 65.20           |
| 2                           | 15     | 7       | 22           | 12.20                    | 5.69    | 68.18                   | 31.82   | 87.00           |
| 3                           | 18     | 5       | 23           | 14.63                    | 4.07    | 78.26                   | 21.74   | 80.40           |
| 4                           | 8      | 24      | 32           | 6.50                     | 19.51   | 25.00                   | 75.00   | 63.00           |
| 5                           | 18     | 37      | 55           | 14.63                    | 30.08   | 32.73                   | 67.27   | 47.80           |
| 6                           | 8      | 58      | 66           | 6.50                     | 47.15   | 12.12                   | 87.88   | 59.00           |
| 7                           | 14     | 42      | 56           | 11.38                    | 34.15   | 25.00                   | 75.00   | 63.00           |
| 8                           | 28     | 26      | 54           | 22.76                    | 21.14   | 51.85                   | 48.15   | 69.60           |
| 9                           | 14     | 34      | 48           | 11.38                    | 27.64   | 29.17                   | 70.83   | 58.70           |
| 10                          | 5      | 9       | 14           | 4.07                     | 7.32    | 35.71                   | 64.29   | 87.00           |
| 11                          | 16     | 7       | 23           | 13.01                    | 5.69    | 69.57                   | 30.43   | 95.70           |
| 12                          | 15     | 0       | 15           | 12.20                    | 0.00    | 100.00                  | 0.00    | 73.90           |
| 13                          | 19     | 7       | 26           | 15.45                    | 5.69    | 73.08                   | 26.92   | 91.30           |
| 14                          | 5      | 5       | 10           | 4.07                     | 4.07    | 50.00                   | 50.00   | 76.10           |
| 15                          | 11     | 10      | 21           | 8.94                     | 8.13    | 52.38                   | 47.62   | 58.70           |
| 16                          | 6      | 57      | 63           | 4.88                     | 46.34   | 9.52                    | 90.48   | 43.50           |
| 17                          | 10     | 9       | 19           | 8.13                     | 7.32    | 52.63                   | 47.37   | 60.90           |
| 18                          | 2      | 11      | 13           | 1.63                     | 8.94    | 15.38                   | 84.62   | 80.40           |
| 19                          | 13     | 3       | 16           | 10.57                    | 2.44    | 81.25                   | 18.75   | 84.80           |
| 20                          | 15     | 1       | 16           | 12.20                    | 0.81    | 93.75                   | 6.25    | 57.50           |
| 21                          | 16     | 14      | 30           | 13.01                    | 11.38   | 53.33                   | 46.67   | 74.00           |
| 22                          | 14     | 57      | 71           | 11.38                    | 46.34   | 19.72                   | 80.28   | 39.10           |
| 23                          | 13     | 5       | 18           | 10.57                    | 4.07    | 72.22                   | 27.78   | 80.40           |
| 24                          | 5      | 7       | 12           | 4.07                     | 5.69    | 41.67                   | 58.33   | 89.10           |
| 25                          | 3      | 9       | 12           | 2.44                     | 7.32    | 25.00                   | 75.00   | 76.10           |
| 26                          | 17     | 13      | 30           | 13.82                    | 10.57   | 56.67                   | 43.33   | 69.60           |
| 27                          | 25     | 15      | 40           | 20.33                    | 12.20   | 62.50                   | 37.50   | 50.00           |
| 28                          | 12     | 8       | 20           | 9.76                     | 6.50    | 60.00                   | 40.00   | 82.60           |
| 29                          | 25     | 4       | 29           | 20.33                    | 3.25    | 86.21                   | 13.79   | 71.70           |
| 30                          | 3      | 3       | 6            | 2.44                     | 2.44    | 50.00                   | 50.00   | 63.00           |
| 31                          | 3      | 6       | 9            | 2.44                     | 4.88    | 33.33                   | 66.67   | 71.70           |
| 32                          | 1      | 4       | 5            | 0.81                     | 3.25    | 20.00                   | 80.00   | 76.10           |
| 33                          | 8      | 39      | 47           | 6.50                     | 31.71   | 17.02                   | 82.98   | 67.40           |
| 34                          | 12     | 3       | 15           | 9.76                     | 2.44    | 80.00                   | 20.00   | 80.40           |

|           |    |    |    |  |       |       |  |       |        |  |       |
|-----------|----|----|----|--|-------|-------|--|-------|--------|--|-------|
| <b>35</b> | 4  | 6  | 10 |  | 3.25  | 4.88  |  | 40.00 | 60.00  |  | 54.30 |
| <b>36</b> | 8  | 4  | 12 |  | 6.50  | 3.25  |  | 66.67 | 33.33  |  | 76.10 |
| <b>37</b> | 8  | 79 | 87 |  | 6.50  | 64.23 |  | 9.20  | 90.80  |  | 50.00 |
| <b>38</b> | 13 | 3  | 16 |  | 10.57 | 2.44  |  | 81.25 | 18.75  |  | 73.90 |
| <b>39</b> | 12 | 8  | 20 |  | 9.76  | 6.50  |  | 60.00 | 40.00  |  | 69.60 |
| <b>40</b> | 13 | 7  | 20 |  | 10.57 | 5.69  |  | 65.00 | 35.00  |  | 60.90 |
| <b>41</b> | 8  | 9  | 17 |  | 6.50  | 7.32  |  | 47.06 | 52.94  |  | 73.90 |
| <b>42</b> | 5  | 10 | 15 |  | 4.07  | 8.13  |  | 33.33 | 66.67  |  | 67.40 |
| <b>43</b> | 1  | 5  | 6  |  | 0.81  | 4.07  |  | 16.67 | 83.33  |  | 78.30 |
| <b>44</b> | 3  | 5  | 8  |  | 2.44  | 4.07  |  | 37.50 | 62.50  |  | 52.20 |
| <b>45</b> | 8  | 16 | 24 |  | 6.50  | 13.01 |  | 33.33 | 66.67  |  | 71.20 |
| <b>46</b> | 9  | 16 | 25 |  | 7.32  | 13.01 |  | 36.00 | 64.00  |  | 78.30 |
| <b>47</b> | 9  | 6  | 15 |  | 7.32  | 4.88  |  | 60.00 | 40.00  |  | 56.50 |
| <b>48</b> | 1  | 10 | 11 |  | 0.81  | 8.13  |  | 9.09  | 90.91  |  | 80.40 |
| <b>49</b> | 8  | 26 | 34 |  | 6.50  | 21.14 |  | 23.53 | 76.47  |  | 50.00 |
| <b>50</b> | 5  | 60 | 65 |  | 4.07  | 48.78 |  | 7.69  | 92.31  |  | 32.60 |
| <b>51</b> | 12 | 14 | 26 |  | 9.76  | 11.38 |  | 46.15 | 53.85  |  | 84.80 |
| <b>52</b> | 18 | 6  | 24 |  | 14.63 | 4.88  |  | 75.00 | 25.00  |  | 65.20 |
| <b>53</b> | 22 | 5  | 27 |  | 17.89 | 4.07  |  | 81.48 | 18.52  |  | 91.30 |
| <b>54</b> | 9  | 60 | 69 |  | 7.32  | 48.78 |  | 13.04 | 86.96  |  | 47.80 |
| <b>55</b> | 15 | 19 | 34 |  | 12.20 | 15.45 |  | 44.12 | 55.88  |  | 69.60 |
| <b>56</b> | 22 | 4  | 26 |  | 17.89 | 3.25  |  | 84.62 | 15.38  |  | 52.20 |
| <b>57</b> | 5  | 1  | 6  |  | 4.07  | 0.81  |  | 83.33 | 16.67  |  | 91.30 |
| <b>58</b> | 0  | 1  | 1  |  | 0.00  | 0.81  |  | 0.00  | 100.00 |  | 71.70 |
| <b>59</b> | 15 | 32 | 47 |  | 12.20 | 26.02 |  | 31.91 | 68.09  |  | 76.10 |
| <b>60</b> | 8  | 22 | 30 |  | 6.50  | 17.89 |  | 26.67 | 73.33  |  | 58.70 |
| <b>61</b> | 23 | 15 | 38 |  | 18.70 | 12.20 |  | 60.53 | 39.47  |  | 58.70 |
| <b>62</b> | 15 | 14 | 29 |  | 12.20 | 11.38 |  | 51.72 | 48.28  |  | 82.60 |
| <b>63</b> | 3  | 5  | 8  |  | 2.44  | 4.07  |  | 37.50 | 62.50  |  | 60.90 |
| <b>64</b> | 12 | 7  | 19 |  | 9.76  | 5.69  |  | 63.16 | 36.84  |  | 73.90 |
| <b>65</b> | 4  | 24 | 28 |  | 3.25  | 19.51 |  | 14.29 | 85.71  |  | 45.70 |
| <b>66</b> | 17 | 14 | 31 |  | 13.82 | 11.38 |  | 54.84 | 45.16  |  | 60.90 |
| <b>67</b> | 9  | 42 | 51 |  | 7.32  | 34.15 |  | 17.65 | 82.35  |  | 43.50 |
| <b>68</b> | 6  | 43 | 49 |  | 4.88  | 34.96 |  | 12.24 | 87.76  |  | 54.30 |
| <b>69</b> | 9  | 21 | 30 |  | 7.32  | 17.07 |  | 30.00 | 70.00  |  | 60.90 |
| <b>70</b> | 14 | 17 | 31 |  | 11.38 | 13.82 |  | 45.16 | 54.84  |  | 58.70 |
| <b>71</b> | 1  | 2  | 3  |  | 0.81  | 1.63  |  | 33.33 | 66.67  |  | 84.80 |
| <b>72</b> | 10 | 6  | 16 |  | 8.13  | 4.88  |  | 62.50 | 37.50  |  | 80.40 |
| <b>73</b> | 13 | 17 | 30 |  | 10.57 | 13.82 |  | 43.33 | 56.67  |  | 56.50 |

|     |    |    |    |  |       |       |           |           |       |  |       |
|-----|----|----|----|--|-------|-------|-----------|-----------|-------|--|-------|
| 74  | 22 | 5  | 27 |  | 17.89 | 4.07  |           | 81.48     | 18.52 |  | 60.90 |
| 75  | 10 | 11 | 21 |  | 8.13  | 8.94  |           | 47.62     | 52.38 |  | 63.00 |
| 76  | 4  | 15 | 19 |  | 3.25  | 12.20 |           | 21.05     | 78.95 |  | 52.20 |
| 77  | 5  | 18 | 23 |  | 4.07  | 14.63 |           | 21.74     | 78.26 |  | 58.70 |
| 78  | 12 | 6  | 18 |  | 9.76  | 4.88  |           | 66.67     | 33.33 |  | 65.20 |
| 79  | 7  | 50 | 57 |  | 5.69  | 40.65 |           | 12.28     | 87.72 |  | 30.40 |
| 80  | 9  | 18 | 27 |  | 7.32  | 14.63 |           | 33.33     | 66.67 |  | 41.30 |
| 81  | 17 | 26 | 43 |  | 13.82 | 21.14 |           | 39.53     | 60.47 |  | 69.60 |
| 82  | 14 | 13 | 27 |  | 11.38 | 10.57 |           | 51.85     | 48.15 |  | 80.40 |
| 83  | 12 | 7  | 19 |  | 9.76  | 5.69  |           | 63.16     | 36.84 |  | 91.30 |
| 84  | 6  | 18 | 24 |  | 4.88  | 14.63 |           | 25.00     | 75.00 |  | 63.00 |
| 85  | 13 | 9  | 22 |  | 10.57 | 7.32  |           | 59.09     | 40.91 |  | 50.00 |
| 86  | 2  | 2  | 4  |  | 1.63  | 1.63  |           | 50.00     | 50.00 |  | 54.30 |
| 87  | 1  | 1  | 2  |  | 0.81  | 0.81  |           | 50.00     | 50.00 |  | 78.30 |
| 88  | 2  | 4  | 6  |  | 1.63  | 3.25  |           | 33.33     | 66.67 |  | 82.60 |
| 89  | 1  | 3  | 4  |  | 0.81  | 2.44  |           | 25.00     | 75.00 |  | 78.30 |
| 90  | 4  | 3  | 7  |  | 3.25  | 2.44  |           | 57.14     | 42.86 |  | 84.70 |
| 91  | 0  | 0  | 0  |  | 0.00  | 0.00  | no errors | no errors |       |  | 69.60 |
| 92  | 0  | 2  | 2  |  | 0.00  | 1.63  | 0.00      | 100.00    |       |  | 78.30 |
| 93  | 0  | 0  | 0  |  | 0.00  | 0.00  | no errors | no errors |       |  | 73.90 |
| 94  | 0  | 0  | 0  |  | 0.00  | 0.00  | no errors | no errors |       |  | 65.20 |
| 95  | 0  | 1  | 1  |  | 0.00  | 0.81  | 0.00      | 100.00    |       |  | 91.30 |
| 96  | 1  | 3  | 4  |  | 0.81  | 2.44  | 25.00     | 75.00     |       |  | 76.10 |
| 97  | 0  | 1  | 1  |  | 0.00  | 0.81  | 0.00      | 100.00    |       |  | 69.60 |
| 98  | 3  | 0  | 3  |  | 2.44  | 0.00  | 100.00    | 0.00      |       |  | 87.00 |
| 99  | 0  | 1  | 1  |  | 0.00  | 0.81  | 0.00      | 100.00    |       |  | 89.10 |
| 100 | 1  | 1  | 2  |  | 0.81  | 0.81  | 50.00     | 50.00     |       |  | 84.80 |
| 101 | 0  | 0  | 0  |  | 0.00  | 0.00  | no errors | no errors |       |  | 93.50 |
| 102 | 14 | 0  | 14 |  | 11.38 | 0.00  | 100.00    | 0.00      |       |  | 73.90 |
| 103 | 10 | 3  | 13 |  | 8.13  | 2.44  | 76.92     | 23.08     |       |  | 76.10 |
| 104 | 0  | 1  | 1  |  | 0.00  | 0.81  | 0.00      | 100.00    |       |  | 91.30 |
| 105 | 0  | 0  | 0  |  | 0.00  | 0.00  | no errors | no errors |       |  | 93.50 |
| 106 | 4  | 1  | 5  |  | 3.25  | 0.81  | 80.00     | 20.00     |       |  | 65.20 |
| 107 | 5  | 4  | 9  |  | 4.07  | 3.25  | 55.56     | 44.44     |       |  | 80.40 |
| 108 | 12 | 1  | 13 |  | 9.76  | 0.81  | 92.31     | 7.69      |       |  | 95.70 |
| 109 | 1  | 3  | 4  |  | 0.81  | 2.44  | 25.00     | 75.00     |       |  | 95.70 |
| 110 | 2  | 0  | 2  |  | 1.63  | 0.00  | 100.00    | 0.00      |       |  | 89.10 |
| 111 | 7  | 2  | 9  |  | 5.69  | 1.63  | 77.78     | 22.22     |       |  | 80.40 |
| 112 | 2  | 0  | 2  |  | 1.63  | 0.00  | 100.00    | 0.00      |       |  | 87.00 |

|            |    |   |    |  |      |      |  |           |           |  |       |
|------------|----|---|----|--|------|------|--|-----------|-----------|--|-------|
| <b>113</b> | 8  | 0 | 8  |  | 6.50 | 0.00 |  | 100.00    | 0.00      |  | 95.70 |
| <b>114</b> | 9  | 1 | 10 |  | 7.32 | 0.81 |  | 90.00     | 10.00     |  | 82.60 |
| <b>115</b> | 7  | 1 | 8  |  | 5.69 | 0.81 |  | 87.50     | 12.50     |  | 87.00 |
| <b>116</b> | 0  | 0 | 0  |  | 0.00 | 0.00 |  | no errors | no errors |  | 93.50 |
| <b>117</b> | 11 | 0 | 11 |  | 8.94 | 0.00 |  | 100.00    | 0.00      |  | 73.90 |
| <b>118</b> | 1  | 3 | 4  |  | 0.81 | 2.44 |  | 25.00     | 75.00     |  | 80.40 |
| <b>119</b> | 4  | 0 | 4  |  | 3.25 | 0.00 |  | 100.00    | 0.00      |  | 65.20 |
| <b>120</b> | 0  | 1 | 1  |  | 0.00 | 0.81 |  | 0.00      | 100.00    |  | 95.70 |
| <b>121</b> | 0  | 0 | 0  |  | 0.00 | 0.00 |  | no errors | no errors |  | 85.00 |
| <b>122</b> | 0  | 0 | 0  |  | 0.00 | 0.00 |  | no errors | no errors |  | 65.20 |
| <b>123</b> | 3  | 1 | 4  |  | 2.44 | 0.81 |  | 75.00     | 25.00     |  | 65.20 |

*Note.* ArtErr = articulation errors; PhonErr = phonological speech errors index; VMPAC = Verbal Motor Production Assessment for Children; Cutoff values for VMPAC: Within Normal Limits: 100-70, Mild: 69-63, Mod: 62-57, Sev: 56 and below.
