# Supplementary material
Source: publisher figshare collection journal article supplement (https://asha.figshare.com/articles/dataset/_/19624020)
Supplement: Supplementary file 3 [file 1]

## **Supplemental Material S1. Speech sound error coding rules and decisions.**

1. Articulation Errors (AE)
  - a. Distortions – all
  - b. /s/ - frontal, lateral
  - c. /r/ & “er”
    - i. central, vocalized, /w/ for /r/ = articulation error
    - ii. final “er” to an /o/ = vocalization error, therefore, count as PE not articulation
    - iii. final “er” is centralized = articulation error
  - d. f/th and v/th
  - e. vowel changes – do not count
2. Phonological Errors (PE)
  - a. Use Khan-Lewis Phonological Assessment form as reference
  - b. Do not distinguish between typical and atypical
  - c. More than 1 process on a phoneme – count only once
    - i. “f” for “sl” = fronting & cluster reduction; count 1 PE
  - d. /w/ for /l/ = PE (gliding)
